# Supplementary material
Source: ML conference proceedings conference paper supplement (https://openaccess.thecvf.com/content/ICCV_2017/html/Cheng_SegFlow_Joint_Learning_ICCV_2017_paper.html)
Supplement: Supplementary file 1 [file Cheng_SegFlow_Joint_Learning_ICCV_2017_supplemental.pdf]

# SegFlow: Joint Learning for Video Object Segmentation and Optical Flow

Jingchun Cheng<sup>1,2</sup> Yi-Hsuan Tsai<sup>2,4</sup> Shengjin Wang<sup>1\*</sup> Ming-Hsuan Yang<sup>2,3</sup>

<sup>1</sup>Tsinghua University <sup>2</sup>University of California, Merced

<sup>3</sup>NVIDIA Research <sup>4</sup>NEC Laboratories America

<sup>1</sup>chengjingchun@gmail.com, wsgsj@tsinghua.edu.cn

<sup>2</sup>{ytsai2, mhyang}@ucmerced.edu

## 1. Contents

This supplementary material provides additional results and analysis for both optical flow estimation and foreground object segmentation. In the following, we provide:

- Details of training data for optical flow on the KITTI [5] and MPI Sintel [1] datasets in Section 2
- Per-class evaluation of segmentation on DAVIS [9] in Section 3.
- Example results of optical flow (Figure 1-3) and object segmentation (Figure 4-8).

## 2. Optical Flow Estimation

In this section, we describe more details of training process on KITTI and Sintel in Table 3 of the manuscript.

**KITTI.** We finetune our model (SegFlow+ft) and FlowNetS [4] (FlowNetS+ft\*) with the KITTI training set without data augmentation, and select the best model with 10-fold cross validation for comparisons.

**Sintel.** Similarly, we finetune our model (SegFlow+ft) and FlowNetS [4] (FlowNetS+ft\*) on the Sintel training set using only original images and their flips, and select the best model using the validation set as in [4].

We show example results for comparisons between *SegFlow* and FlowNetS in Figure 1. In addition, we show visual comparisons of optical flow on DAVIS in Figure 2 and 3, in which our method generates more complete optical flow within the object corresponding to our segmentation results.

## 3. Video Object Segmentation

Table 1 presents the per-sequence evaluation ( $J_{mean}$ ) on DAVIS compared to other state-of-the-art methods, including semi-supervised and unsupervised ones. we improve the  $J_{mean}$  by considering the prediction of the image and its flipping one, and averaging both outputs to obtain the final result, where we refer to as Ours<sup>2</sup>. Without adding much computational cost, we further boost the performance with 1.3% in  $J_{mean}$  as shown in Table 1. We also present the results of MSK [6] with only using the image as the input (MSK-flo), and show that our method without flow performs better (Ours-flo v.s MSK-flo).

More comparisons between *SegFlow* and state-of-the-art methods are shown in Figure 4-8. To summarize the results in Table 1, we find that:

- *SegFlow* outperforms state-of-the-art unsupervised methods in most sequences.
- Online training is helpful for sequences with various appearance changes (Ours<sup>2</sup> v.s Ours-ol), such as non-rigid objects (e.g., camel, cows and soapbox), especially for sequences with dynamic backgrounds (e.g., 48.8% and 13.8% improvement for breakdance and dance-twirl respectively).
- Optical flow branch improves segmentation results (Ours<sup>2</sup> v.s Ours-flo) in most sequences (e.g., bmx-trees, breakdance, goat and libby), especially on the ones with large motion changes (e.g., 25% improvement for motocross-jump).

---

\*Corresponding Author

Table 1. Per-sequence results on DAVIS validation Set.

| Sequence           | Semi-Supervised   |       |          |              |              |             |              | Unsupervised |              |              |              |
|--------------------|-------------------|-------|----------|--------------|--------------|-------------|--------------|--------------|--------------|--------------|--------------|
|                    | Ours <sup>2</sup> | Ours  | Ours-flo | OSVOS [2]    | MSK [6]      | MSK-flo [6] | OFL [10]     | Ours-ol      | FST [8]      | NLC [3])     | KEY [7]      |
| blackswan          | 0.920             | 0.904 | 0.904    | 0.942        | 0.903        | 0.919       | <b>0.947</b> | <b>0.903</b> | 0.732        | 0.875        | 0.842        |
| bmx-trees          | 0.457             | 0.450 | 0.437    | 0.555        | <b>0.575</b> | 0.321       | 0.149        | <b>0.437</b> | 0.180        | 0.212        | 0.193        |
| breakdance         | 0.682             | 0.660 | 0.561    | 0.708        | <b>0.762</b> | 0.594       | 0.496        | 0.194        | 0.467        | <b>0.673</b> | 0.549        |
| camel              | 0.791             | 0.782 | 0.760    | 0.851        | 0.801        | 0.804       | <b>0.867</b> | <b>0.760</b> | 0.562        | 0.768        | 0.579        |
| car-roundabout     | 0.857             | 0.857 | 0.875    | 0.953        | <b>0.960</b> | 0.828       | 0.900        | <b>0.874</b> | 0.808        | 0.509        | 0.640        |
| car-shadow         | <b>0.945</b>      | 0.902 | 0.902    | 0.937        | 0.935        | 0.903       | 0.846        | <b>0.902</b> | 0.698        | 0.645        | 0.589        |
| cows               | 0.906             | 0.894 | 0.888    | <b>0.946</b> | 0.882        | 0.919       | 0.910        | 0.727        | 0.791        | <b>0.883</b> | 0.337        |
| dance-twirl        | 0.734             | 0.730 | 0.683    | 0.670        | <b>0.844</b> | 0.678       | 0.567        | <b>0.596</b> | 0.453        | 0.347        | 0.380        |
| dog                | <b>0.930</b>      | 0.923 | 0.912    | 0.907        | 0.909        | 0.868       | 0.897        | <b>0.918</b> | 0.708        | 0.809        | 0.692        |
| drift-chicane      | 0.378             | 0.360 | 0.541    | 0.835        | <b>0.862</b> | 0.005       | 0.175        | 0.090        | <b>0.667</b> | 0.324        | 0.188        |
| drift-straight     | <b>0.899</b>      | 0.897 | 0.826    | 0.676        | 0.560        | 0.460       | 0.314        | <b>0.860</b> | 0.682        | 0.473        | 0.194        |
| goat               | 0.861             | 0.854 | 0.844    | <b>0.880</b> | 0.845        | 0.858       | 0.865        | <b>0.836</b> | 0.554        | 0.010        | 0.705        |
| horsejump-high     | 0.760             | 0.752 | 0.732    | 0.780        | 0.817        | 0.784       | <b>0.862</b> | 0.678        | 0.578        | <b>0.834</b> | 0.370        |
| kite-surf          | 0.587             | 0.569 | 0.552    | 0.686        | 0.600        | 0.587       | <b>0.702</b> | 0.525        | 0.272        | 0.453        | <b>0.685</b> |
| libby              | 0.700             | 0.686 | 0.655    | <b>0.808</b> | 0.775        | 0.788       | 0.594        | <b>0.670</b> | 0.507        | 0.635        | 0.611        |
| motocross-jump     | <b>0.839</b>      | 0.835 | 0.589    | 0.816        | 0.685        | 0.690       | 0.594        | <b>0.714</b> | 0.602        | 0.251        | 0.288        |
| paragliding-launch | 0.581             | 0.580 | 0.554    | 0.625        | 0.620        | 0.589       | <b>0.637</b> | 0.580        | 0.506        | <b>0.628</b> | 0.559        |
| parkour            | 0.849             | 0.840 | 0.791    | 0.856        | <b>0.882</b> | 0.853       | 0.861        | 0.813        | 0.458        | <b>0.902</b> | 0.410        |
| scooter-black      | 0.699             | 0.692 | 0.694    | 0.711        | <b>0.825</b> | 0.649       | 0.765        | <b>0.660</b> | 0.522        | 0.162        | 0.502        |
| soapbox            | 0.837             | 0.789 | 0.779    | 0.812        | <b>0.899</b> | 0.861       | 0.689        | 0.737        | 0.410        | 0.634        | <b>0.757</b> |
| mean               | 0.761             | 0.748 | 0.724    | <b>0.798</b> | 0.797        | 0.698       | 0.680        | <b>0.674</b> | 0.558        | 0.551        | 0.498        |

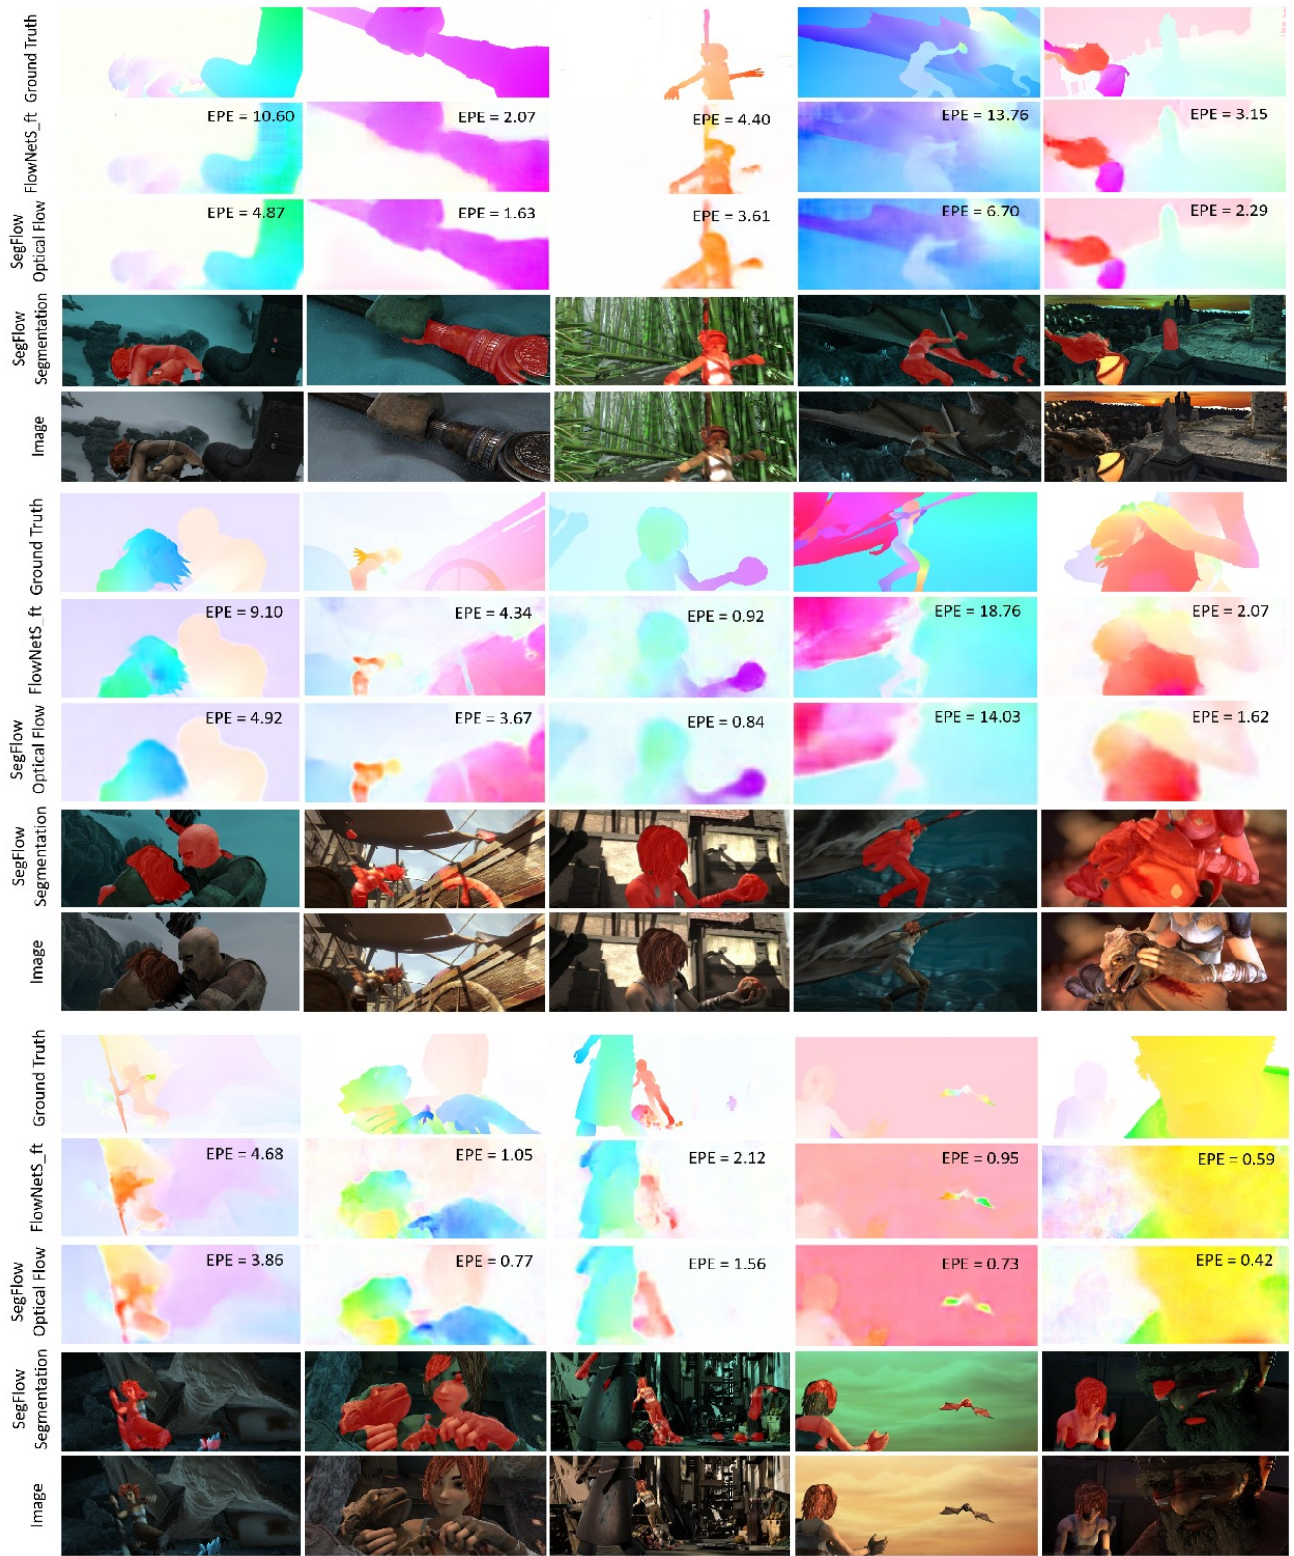

Figure 1. Example results on Sintel. For each set of results, row one to four shows the ground truth, optical flow predicted by FlowNetS+ft\* (see Section 5.4 in paper for details), *SegFlow* and object segmentation generated by *SegFlow*, respectively.



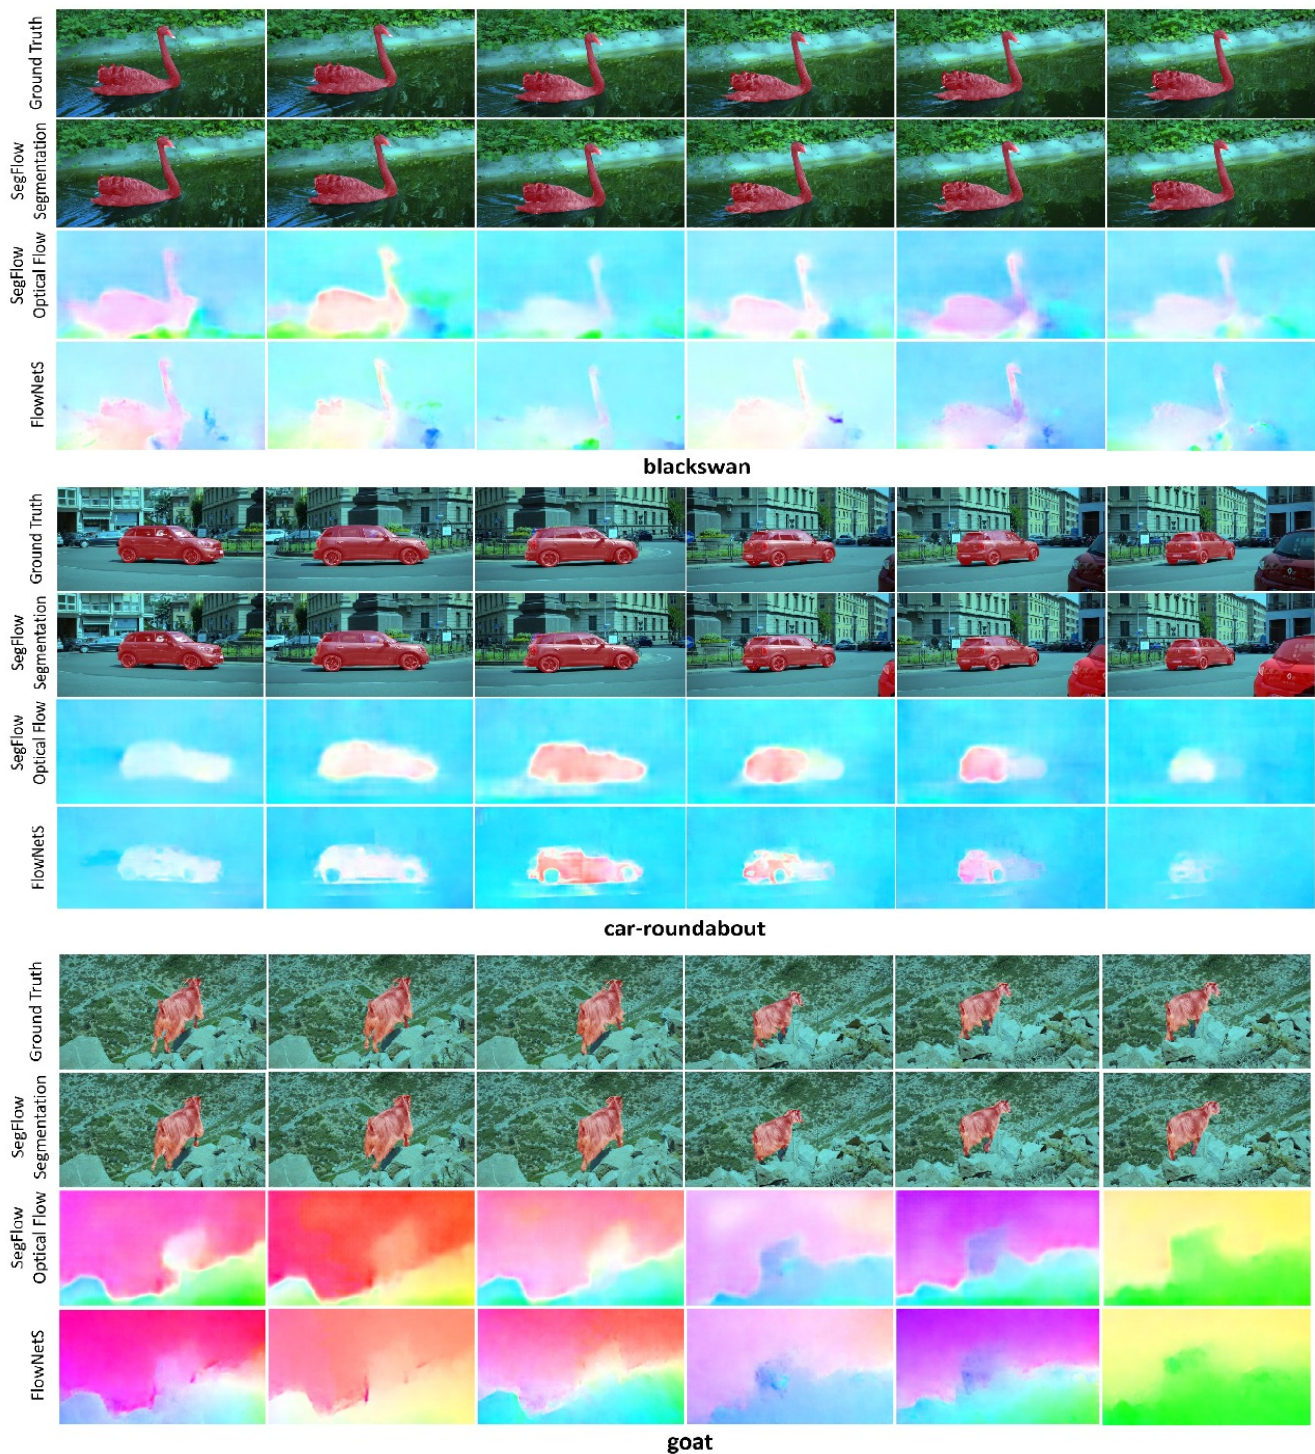

Figure 2. Example results on DAVIS. Row one to four of each sequence shows the annotations, our object segmentation and optical flow predicted by *SegFlow* and optical flow produced by FlowNetS [4], respectively.



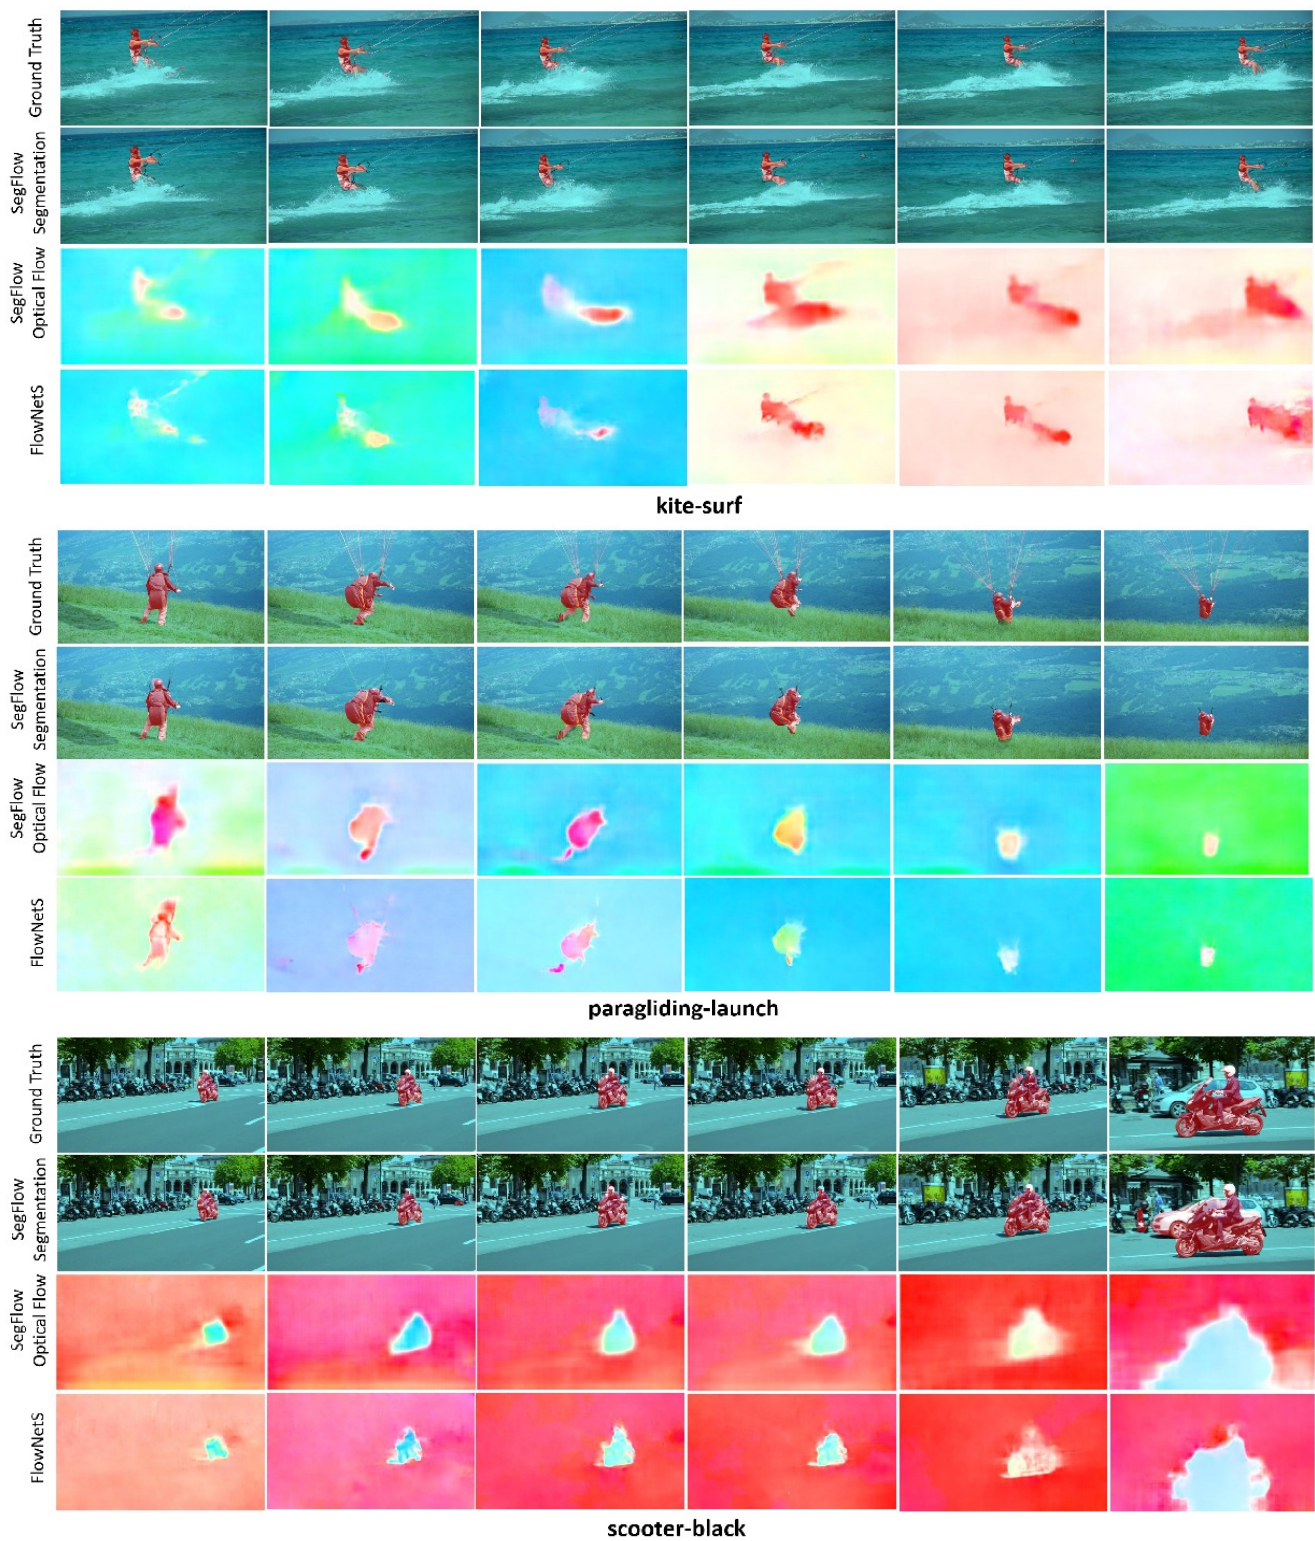

Figure 3. Example results on DAVIS. Row one to four of each sequence shows the annotations, our object segmentation and optical flow predicted by *SegFlow* and optical flow produced by FlowNetS [4], respectively.



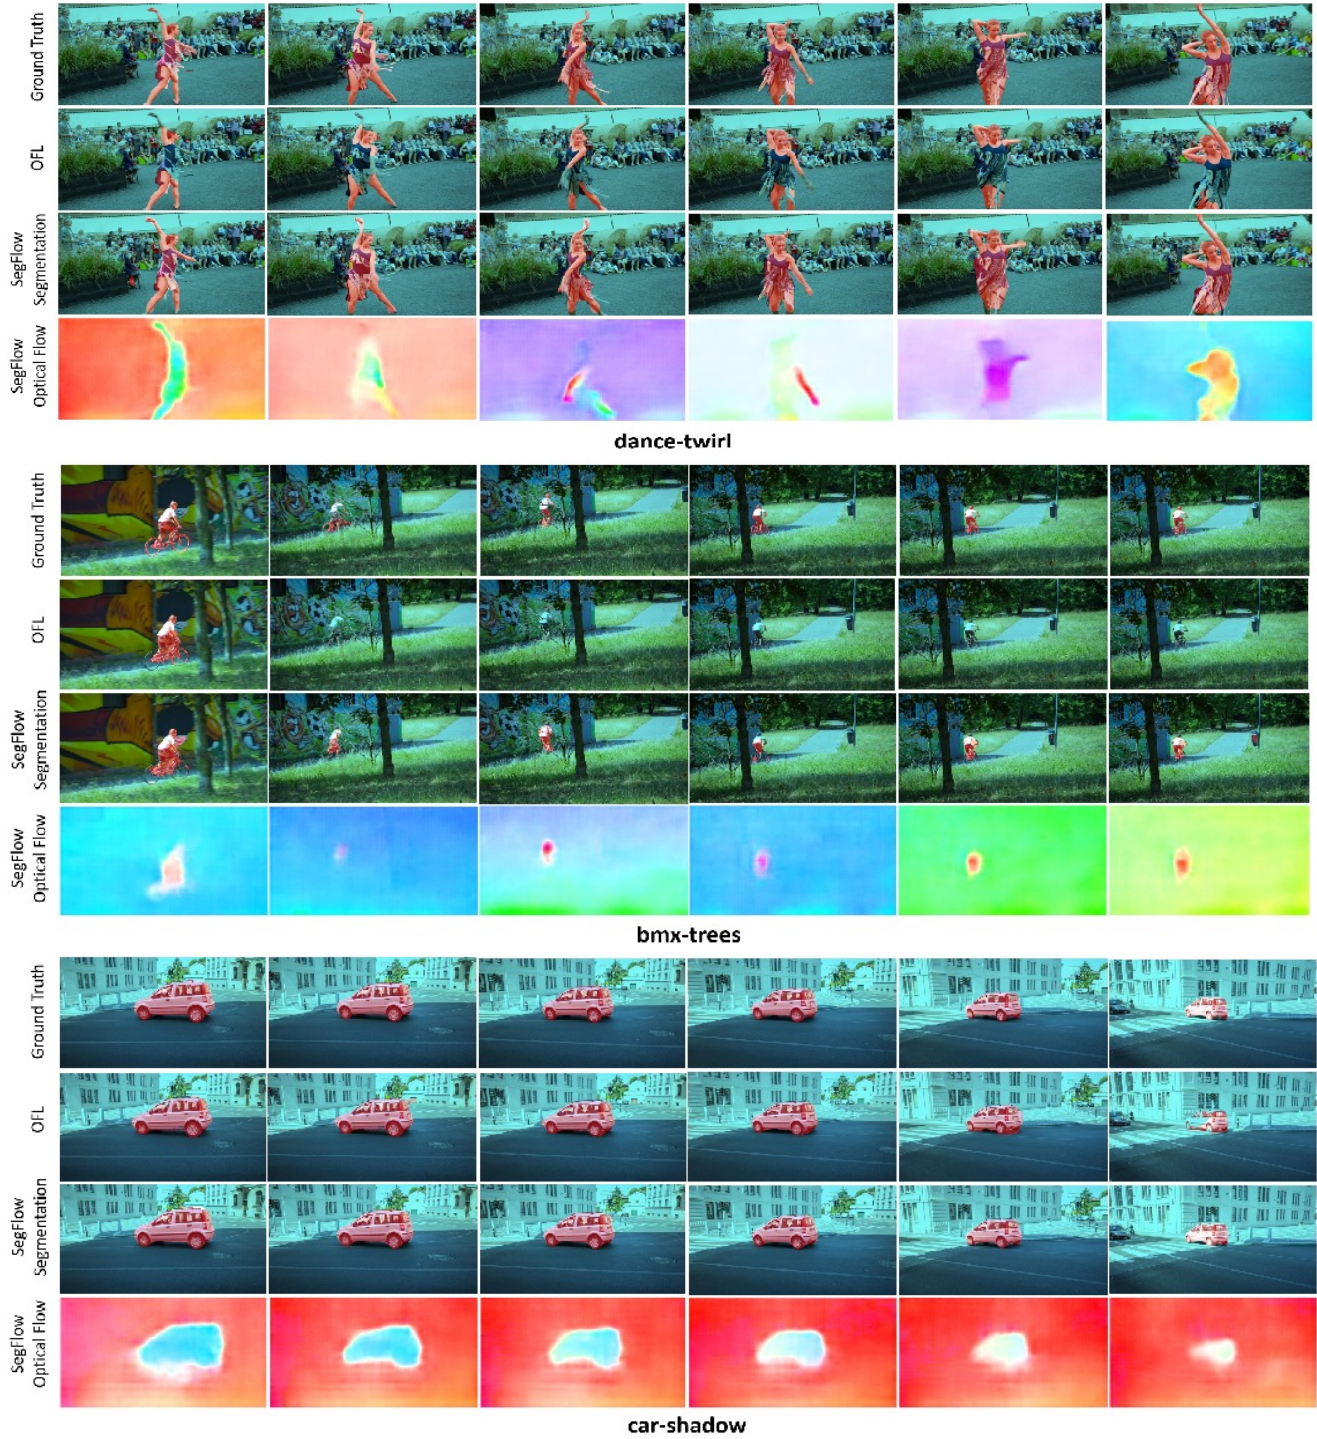

Figure 4. Example results on DAVIS. Row one to four of each sequence shows the annotations, object segmentation by OFL [10], object segmentation by *SegFlow*, and optical flow prediction by *SegFlow* respectively.



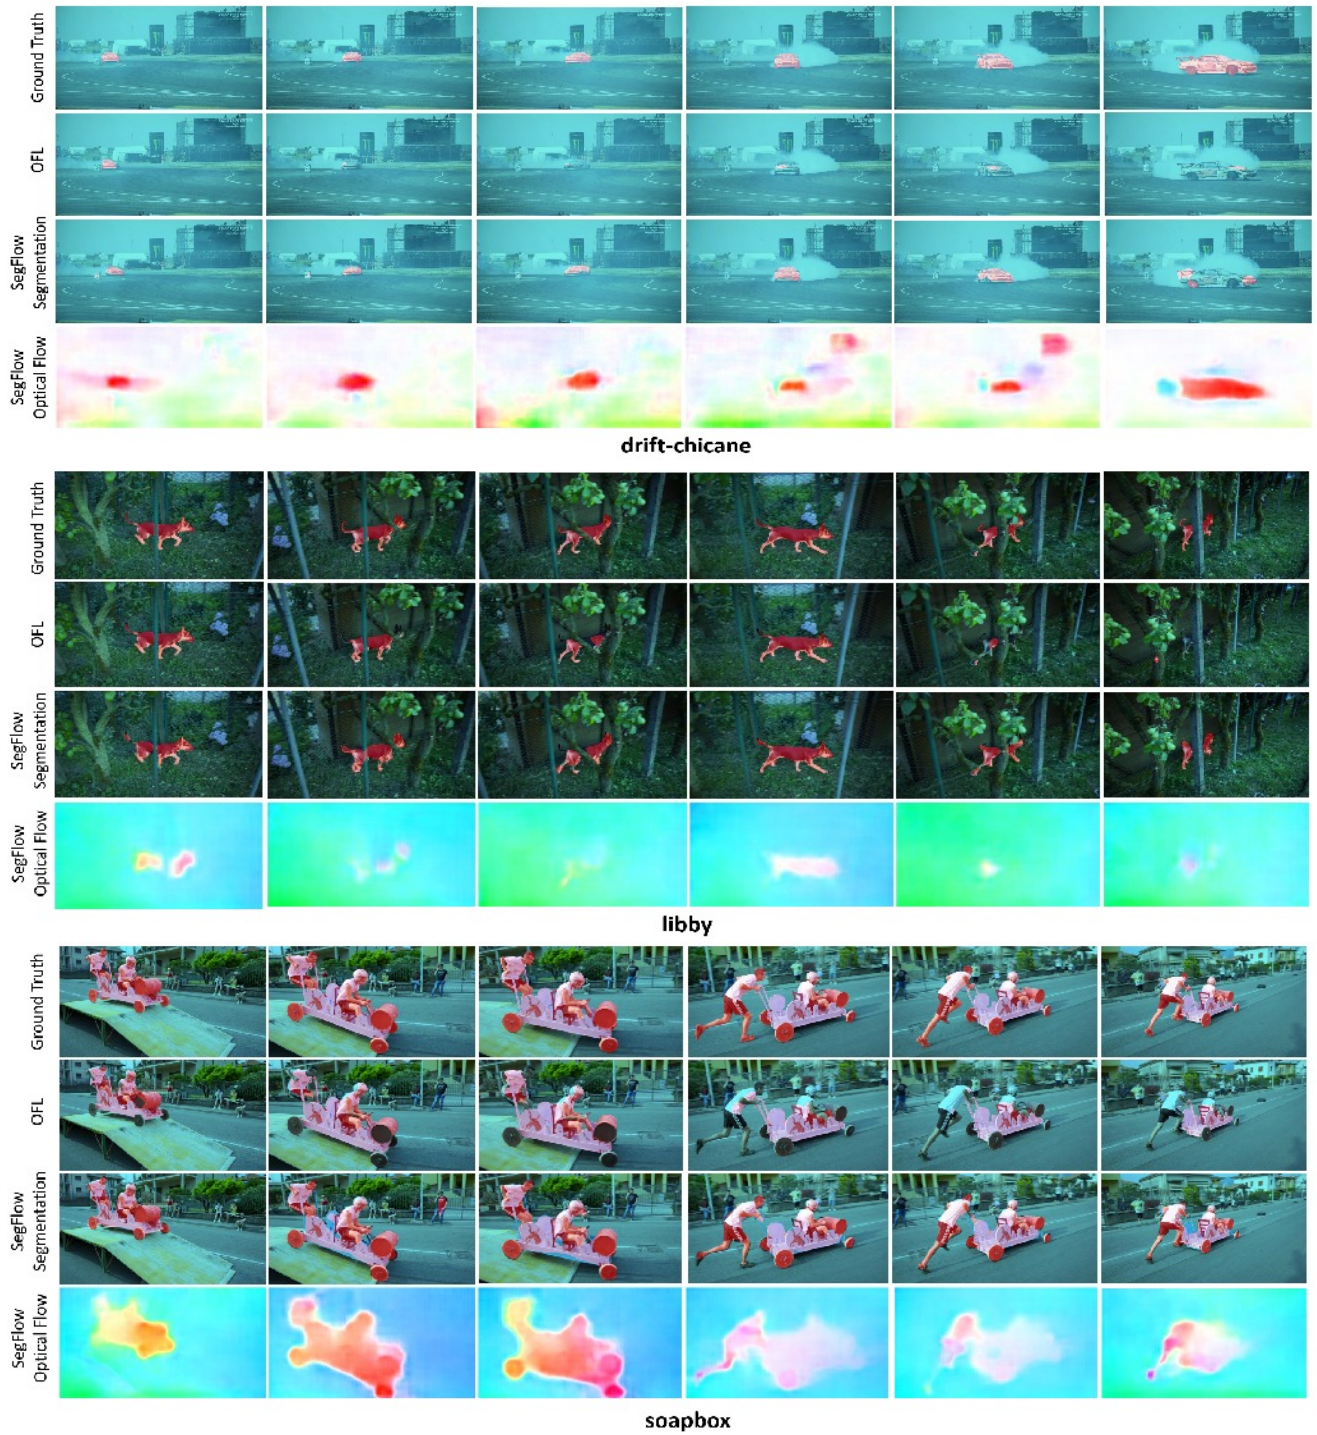

Figure 5. Example results on DAVIS. Row one to four of each sequence shows the annotations, object segmentation by OFL [10], object segmentation by *SegFlow*, and optical flow prediction by *SegFlow* respectively.



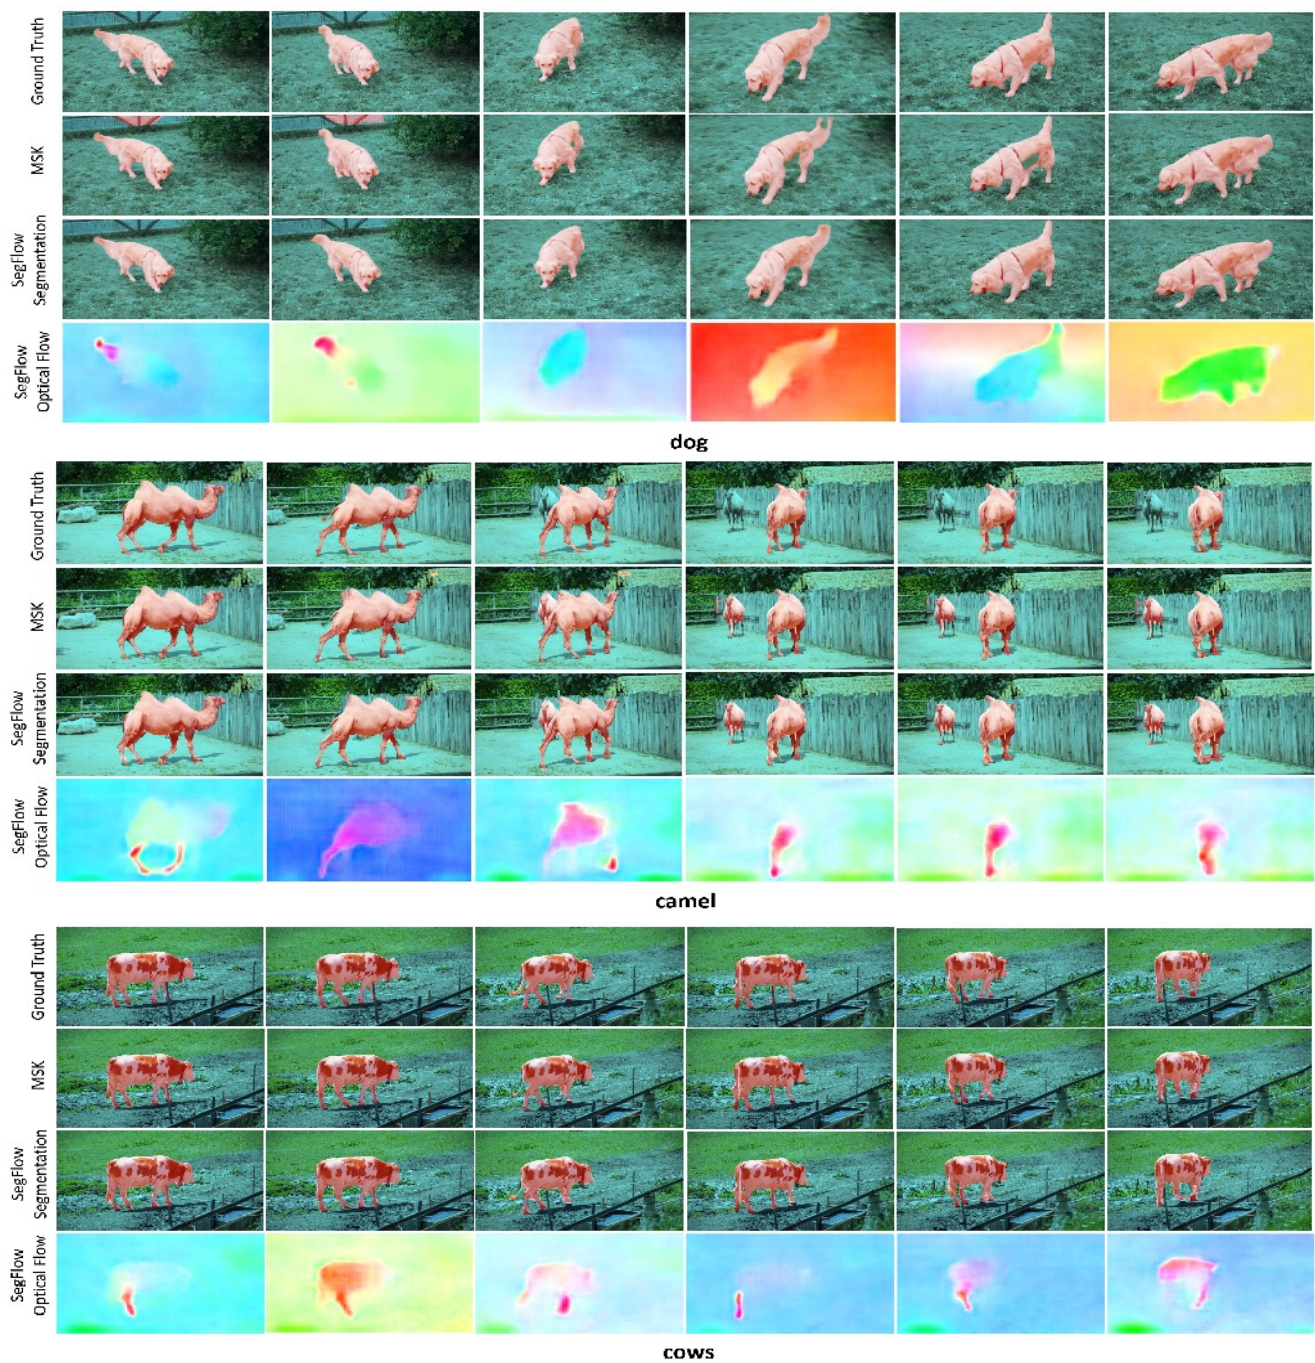

Figure 6. Example results on DAVIS dataset. Row one to four of each sequence shows the annotations, object segmentation by MSK [6], object segmentation by *SegFlow*, and optical flow prediction by *SegFlow* respectively.



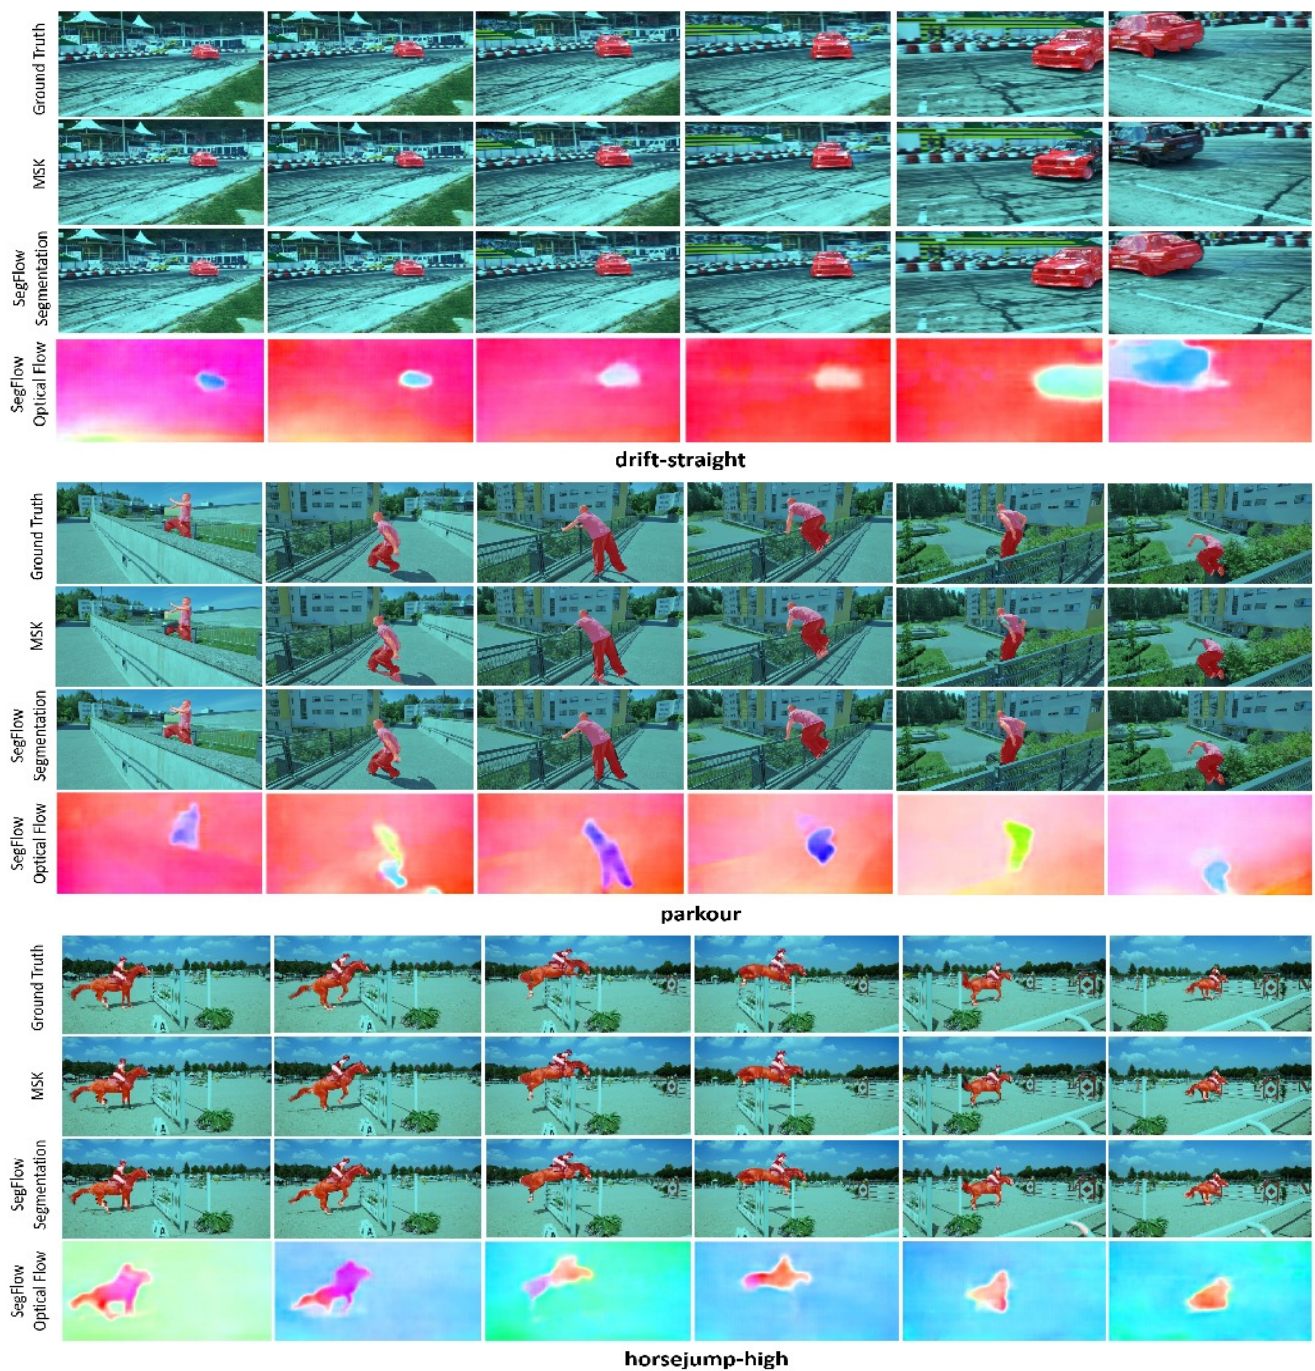

Figure 7. Example results on DAVIS. Row one to four of each sequence shows the annotations, object segmentation by MSK [6], object segmentation by *SegFlow*, and optical flow prediction by *SegFlow* respectively.



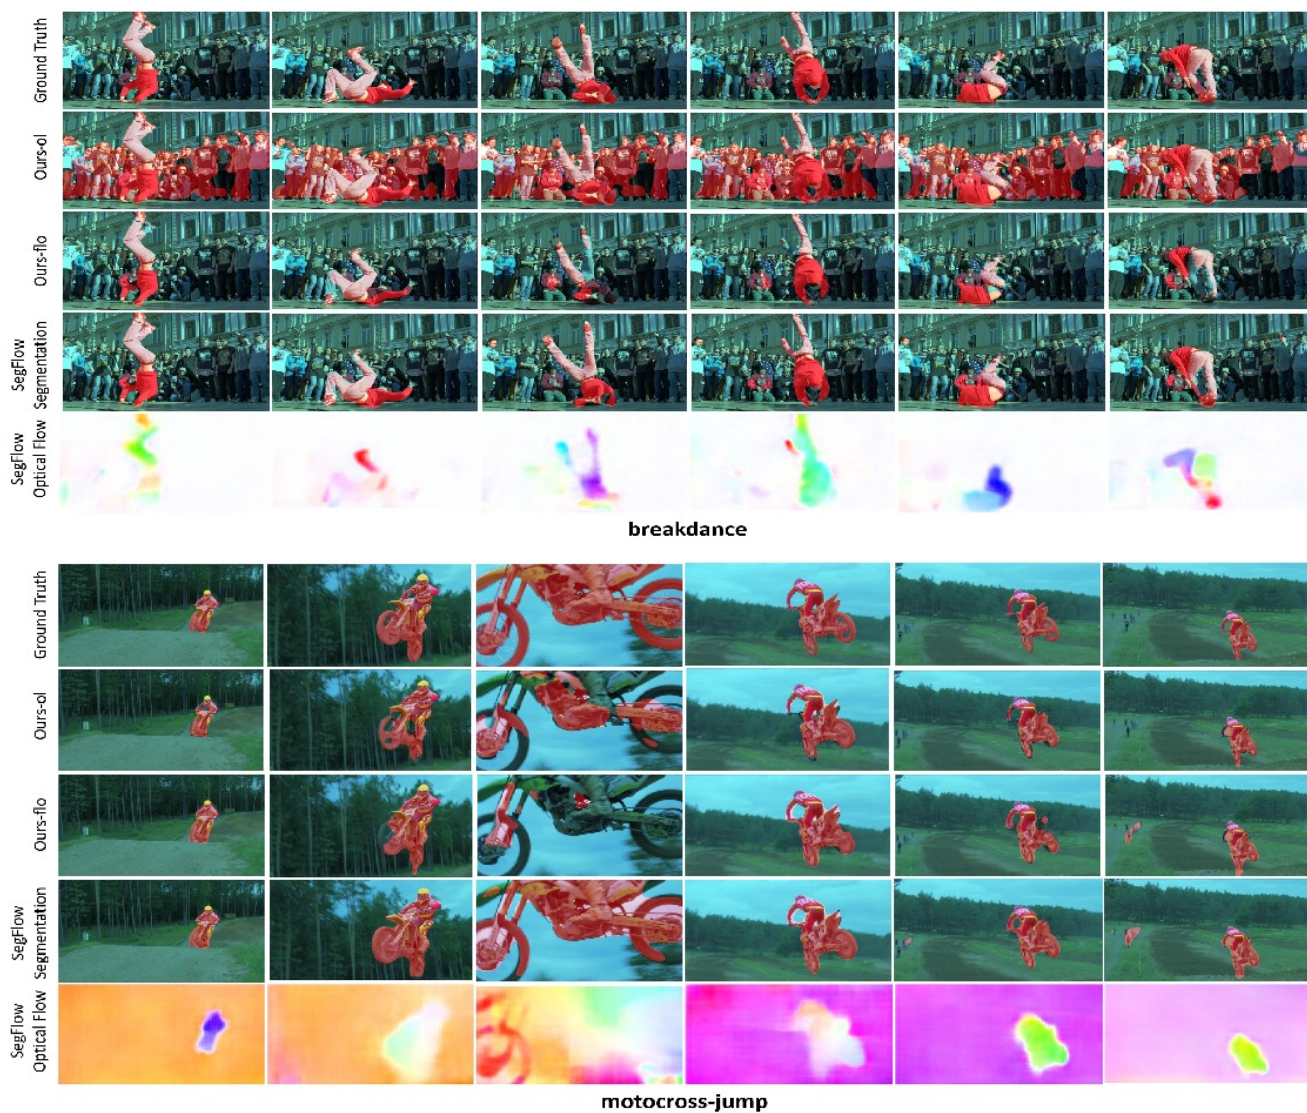

Figure 8. Example results on DAVIS. Row one to four of each sequence shows the annotations, object segmentation by *SegFlow* without online training (Ours-ol), *SegFlow* without optical flow branch (Ours-flo), *SegFlow*, and optical flow prediction by *SegFlow* respectively.



## References

- [1] D. J. Butler, J. Wulff, G. B. Stanley, and M. J. Black. A naturalistic open source movie for optical flow evaluation. In *ECCV*, 2012. [1](#)
- [2] S. Caelles, K.-K. Maninis, J. Pont-Tuset, L. Leal-Taixé, D. Cremers, and L. Van Gool. One-shot video object segmentation. In *CVPR*, 2017. [2](#)
- [3] A. Faktor and M. Irani. Video segmentation by non-local consensus voting. In *BMVC*, 2014. [2](#)
- [4] P. Fischer, A. Dosovitskiy, E. Ilg, P. Häusser, C. Hazırbaş, V. Golkov, P. van der Smagt, D. Cremers, and T. Brox. Flownet: Learning optical flow with convolutional networks. In *ICCV*, 2015. [1](#), [4](#), [5](#)
- [5] A. Geiger, P. Lenz, and R. Urtasun. Are we ready for autonomous driving? the kitti vision benchmark suite. In *CVPR*, 2012. [1](#)
- [6] A. Khoreva, F. Perazzi, R. Benenson, B. Schiele, and A. Sorkine-Hornung. Learning video object segmentation from static images. In *CVPR*, 2017. [1](#), [2](#), [8](#), [9](#)
- [7] Y. J. Lee, J. Kim, and K. Grauman. Key-segments for video object segmentation. In *ICCV*, 2011. [2](#)
- [8] A. Papazoglou and V. Ferrari. Fast object segmentation in unconstrained video. In *ICCV*, 2013. [2](#)
- [9] F. Perazzi, J. Pont-Tuset, B. McWilliams, L. V. Gool, M. Gross, and A. Sorkine-Hornung. A benchmark dataset and evaluation methodology for video object segmentation. In *CVPR*, 2016. [1](#)
- [10] Y.-H. Tsai, M.-H. Yang, and M. J. Black. Video segmentation via object flow. In *CVPR*, 2016. [2](#), [6](#), [7](#)
